# Supplementary material
Source: MDPI journal article supplement (https://www.mdpi.com/2227-9717/12/4/756)
Supplement: s1 [file s1]

## **SUPPLEMENTARY INFORMATION**

### **Structural Behaviour and Charge Compensation Mechanism in $\text{Li}_2\text{Fe}_{1-x}\text{Co}_x\text{SeO}$ Solid Solutions During Reversible Delithiation**

Mikhail V. Gorbunov\*, Daria Mikhailova

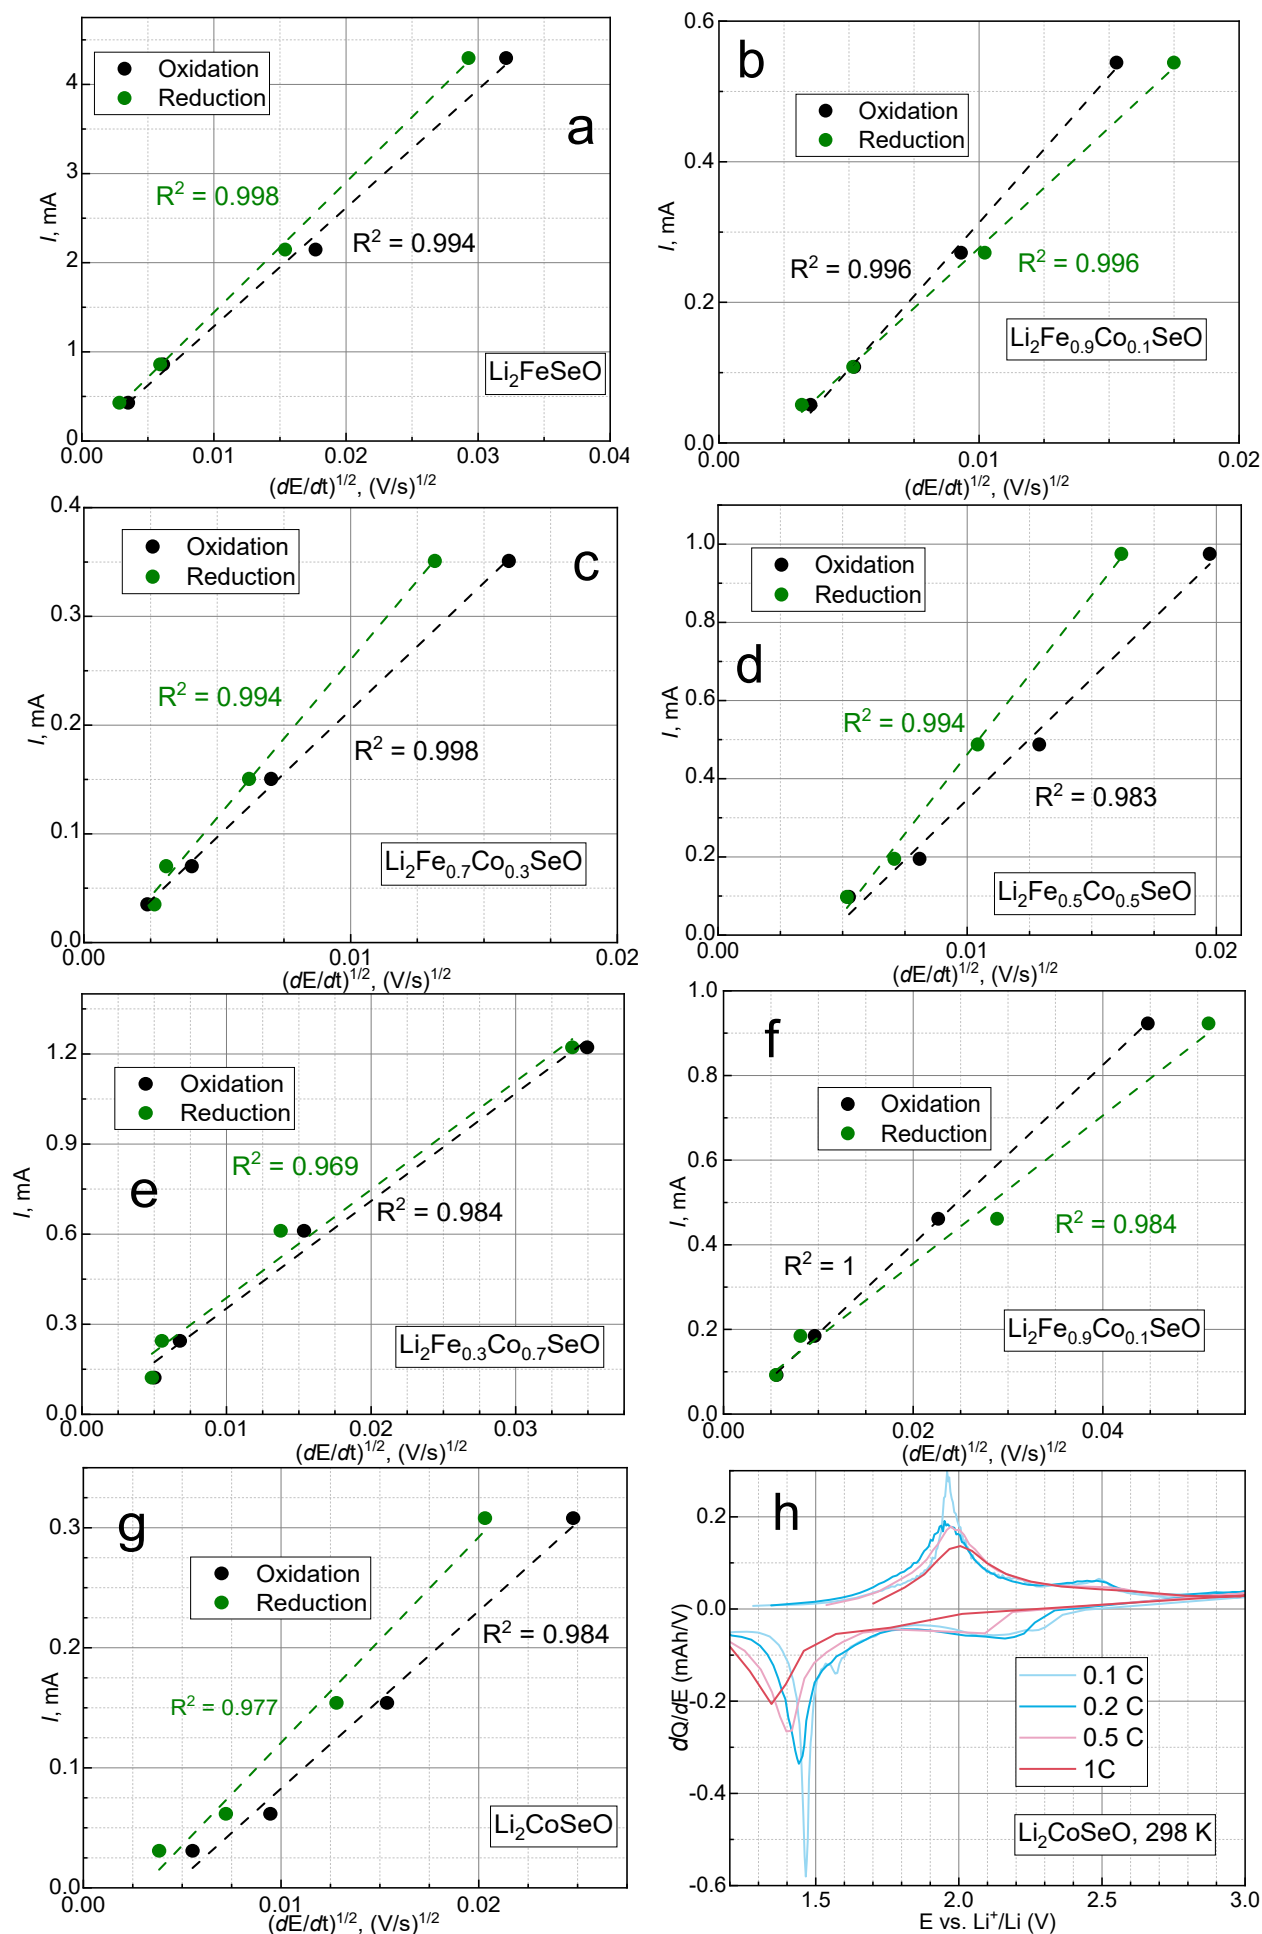

Figure S1. (a – g) Linear relationship between the applied current and square root of voltage changing rate for  $\text{Li}_2\text{Fe}_{1-x}\text{Co}_x\text{SeO}$  anti-perovskites at the maximal values of differential capacity plots. Panel h –  $dQ/dE$  plots for  $\text{Li}_2\text{CoSeO}$  as an example. The value of  $R^2 \geq 0.95$  was considered as statistically reliable.

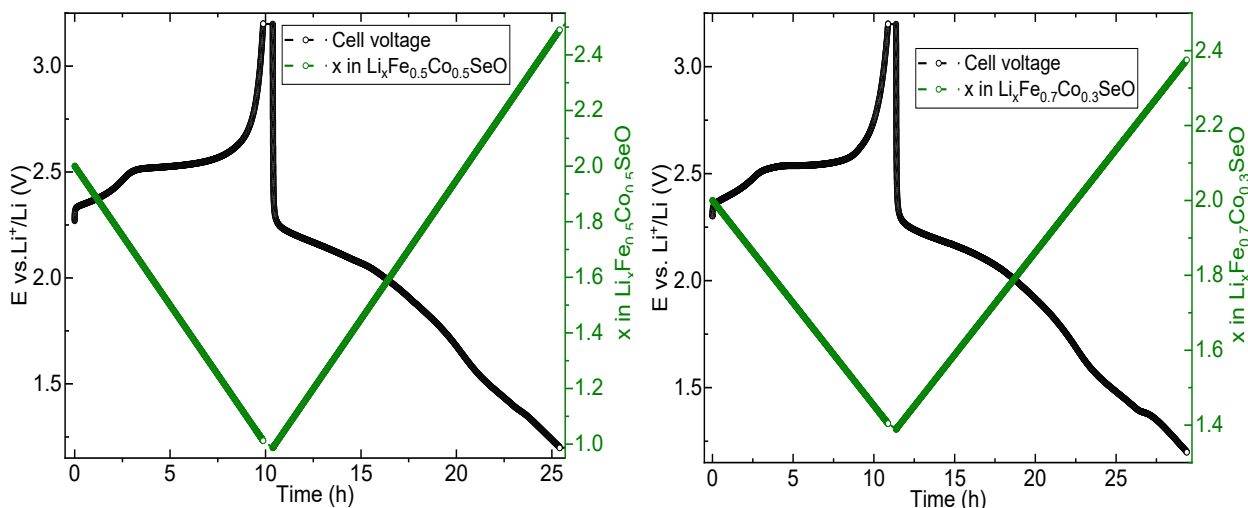

Figure S2: Voltage and  $x$  vs. time for (left)  $\text{Li}_x\text{Fe}_{0.5}\text{Co}_{0.5}\text{SeO}$ - and (right)  $\text{Li}_x\text{Fe}_{0.7}\text{Co}_{0.3}\text{SeO}$ -based *operando* cells. Current density was 0.1 C.

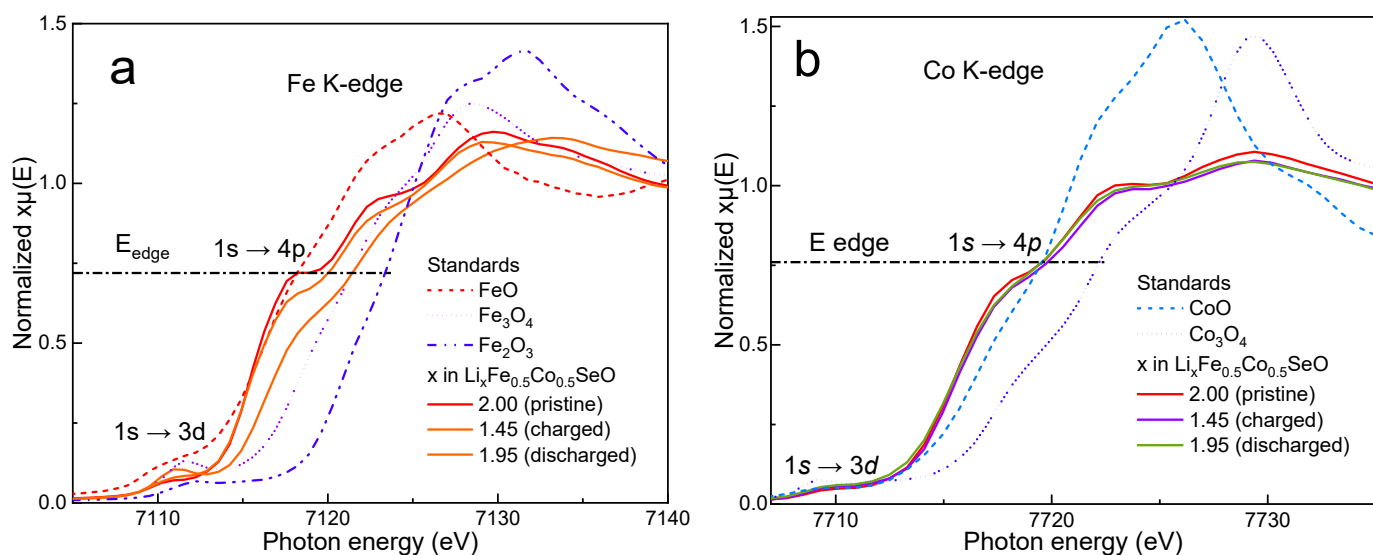

Figure S3. Part of XAS spectra recorded for  $\text{Li}_2\text{Fe}_{0.5}\text{Co}_{0.5}\text{SeO}$  in (a) Fe K-edge and (b) Co K-edge, to evaluate the initial valence states and redox behaviours of 3d elements.
